# Supplementary material for: Effects of 5-Year Nitrogen Addition on Species Composition and Diversity of an Alpine Steppe Plant Community on Qinghai-Tibetan Plateau
Source: MDPI journal article supplement (doi:10.3390/plants11070966), 2022-04-01
Supplement: s1 [file s1]

**Table S1** The changes of total plant species number /m<sup>2</sup> under different N addition rates.

| Treatment          | total plant species number / m <sup>2</sup> |
|--------------------|---------------------------------------------|
| CK1                | 5                                           |
| CK2                | 10                                          |
| CK3                | 6                                           |
| N <sub>I</sub> 1   | 7                                           |
| N <sub>I</sub> 2   | 9                                           |
| N <sub>I</sub> 3   | 10                                          |
| N <sub>II</sub> 1  | 4                                           |
| N <sub>II</sub> 2  | 5                                           |
| N <sub>II</sub> 3  | 9                                           |
| N <sub>III</sub> 1 | 7                                           |
| N <sub>III</sub> 2 | 5                                           |
| N <sub>III</sub> 3 | 7                                           |
| N <sub>IV</sub> 1  | 4                                           |
| N <sub>IV</sub> 2  | 3                                           |
| N <sub>IV</sub> 3  | 4                                           |
| N <sub>V</sub> 1   | 5                                           |
| N <sub>V</sub> 2   | 2                                           |
| N <sub>V</sub> 3   | 4                                           |

Abbreviations: CK, N<sub>I</sub>, N<sub>II</sub>, N<sub>III</sub>, N<sub>IV</sub> and N<sub>V</sub> are 0, 8, 24, 40, 56 and 72 kg N ha<sup>-1</sup>·y<sup>-1</sup>, respectively; similarly for the following tables and figures.

**Table S2** The changes of total species cover under different N addition rates

| Treatment        | Total species cover / % |
|------------------|-------------------------|
| CK               | 83.00 ± 1.73 c          |
| N <sub>I</sub>   | 87.33 ± 1.20 b          |
| N <sub>II</sub>  | 90.67 ± 0.67 ab         |
| N <sub>III</sub> | 92.00 ± 1.16 a          |
| N <sub>IV</sub>  | 93.67 ± 1.33 a          |
| N <sub>V</sub>   | 94.67 ± 0.88 a          |

Note: Data in the table are presented as mean ± standard error (SE). Different lowercase letters indicate significant differences between levels ( $P < 0.05$ ).

**Table S3** The importance values of all species of alpine steppe under different N addition rates

| Specie name                        | CK             | NI             | N <sub>II</sub> | N <sub>III</sub> | N <sub>IV</sub> | N <sub>V</sub> |
|------------------------------------|----------------|----------------|-----------------|------------------|-----------------|----------------|
| <i>Leymus secalinus</i>            | 0.50 ± 0.06 c  | 0.42 ± 0.05 c  | 0.56 ± 0.13 bc  | 0.73 ± 0.01 ab   | 0.78 ± 0.03 a   | 0.89 ± 0.04 a  |
| <i>Poa crymophila</i>              | 0.33 ± 0.06 ab | 0.39 ± 0.044 a | 0.15 ± 0.09 bc  | 0.17 ± 0.01 bc   | 0.12 ± 0.07 c   | 0.09 ± 0.03 c  |
| <i>Agropyron cristatum</i>         | 0.01 ± 0.01 b  | 0.03 ± 0.01 ab | 0.07 ± 0.01 a   | 0.05 ± 0.01 ab   | 0.06 ± 0.03 ab  | 0.01 ± 0.01 b  |
| <i>Stipapurpurea</i>               | 0.02 ± 0.02 a  | 0.02 ± 0.01 a  | 0.14 ± 0.14 a   | 0.01± 0.00 a     | 0.01 ± 0.01 a   | —              |
| <i>Carex capillifolia</i>          | 0.01 ± 0.01 a  | 0.01 ± 0.00 a  | 0.01 ± 0.01 a   | 0.01 ± 0.00 a    | —               | —              |
| <i>Carex melanantha</i>            | —              | 0.01 ± 0.00    | —               | —                | —               | —              |
| <i>Aster alpinus</i>               | 0.08 ± 0.02 a  | 0.06 ± 0.02a   | 0.01 ± 0.01 b   | 0.01 ± 0.01 b    | —               | 0.01 ± 0.00 b  |
| <i>Potentilla multifida</i>        | 0.01 ± 0.00 a  | 0.01 ± 0.00 a  | 0.05 ± 0.04 a   | 0.01 ± 0.00 a    | —               | —              |
| <i>Thermopsis lanceolata</i>       | 0.03 ± 0.030 a | —              | —               | 0.01 ± 0.01 a    | 0.02 ± 0.02 a   | —              |
| <i>Artemisia eriopoda</i>          | 0.01 ± 0.00    | 0.01 ± 0.01    | —               | —                | —               | —              |
| <i>Dracocephalum heterophyllum</i> | 0.01 ± 0.00 a  | —              | 0.01 ± 0.00 a   | 0.01 ± 0.01 a    | 0.01 ± 0.01 a   | —              |
| <i>Aconitum gymnantrum</i>         | 0.01 ± 0.01 a  | 0.01 ± 0.00 a  | —               | —                | —               | 0.01 ± 0.00 a  |
| <i>Taraxacum mongolicum</i>        | 0.01 ± 0.00 a  | 0.01 ± 0.01 a  | 0.01 ± 0.00 a   | 0.01± 0.00 a     | —               | —              |
| <i>Lancea tibetica</i>             | 0.01 ± 0.00    | —              | —               | —                | —               | —              |
| <i>Plantago asiatica</i>           | —              | 0.01 ± 0.00    | —               | —                | —               | —              |
| <i>Artemisia scoparia</i>          | —              | 0.04 ± 0.04    | 0.01 ± 0.01     | —                | —               | —              |

Note: Data in the table are presented as mean ± standard error (SE) (n = 3). Different lowercase letters within the same row indicate significant differences among levels ( $P < 0.05$ ). The “—” indicates that the species absented at this N addition rate level.

**Table S4** The changes of soil physicochemical under different N addition rates

| soil                    | CK           | N <sub>I</sub> | N <sub>II</sub> | N <sub>III</sub> | N <sub>IV</sub> | N <sub>V</sub> |
|-------------------------|--------------|----------------|-----------------|------------------|-----------------|----------------|
| TN g/kg                 | 2.39±0.19 ab | 2.31±0.12 b    | 2.26±0.22 b     | 2.88±0.15 a      | 2.23±0.16 b     | 2.62±0.07 ab   |
| TC g/kg                 | 31.6±0.31 b  | 32.52±0.64 b   | 32.92±0.42 b    | 32.50±1.08 b     | 33.56±0.61 b    | 37.37±1.06 a   |
| TP g/kg                 | 0.71±0.01 bc | 0.73±0.00 ab   | 0.71±0.01 c     | 0.72±0.01 abc    | 0.73±0.00 ab    | 0.74±0.01 a    |
| TK g/kg                 | 20.74±0.30 a | 20.80±0.30 a   | 20.44±0.14 a    | 20.38±0.16 a     | 20.76±0.06 a    | 20.73±0.15 a   |
| NO <sub>3</sub> -N g/kg | 0.63±0.09 a  | 0.72±0.05 a    | 0.70±0.01 a     | 0.62±0.10 a      | 0.67±0.04 a     | 0.78±0.09 a    |
| NH <sub>4</sub> -N g/kg | 0.90±0.13 c  | 0.91±0.04 c    | 1.11±0.06 bc    | 1.10±0.09 bc     | 1.30±0.07 ab    | 1.49±0.04 a    |
| AP g/kg                 | 0.06±0.01 a  | 0.02±0.00 b    | 0.02±0.00 b     | 0.03±0.00 ab     | 0.04±0.01 ab    | 0.03±0.01 b    |
| AK g/kg                 | 8.87±1.48 a  | 6.52±0.50 ab   | 5.01±0.36 b     | 5.65±0.70 b      | 5.91±0.33 b     | 5.93±0.65 b    |
| Ca g/kg                 | 37.85±0.35 b | 40.99±0.87 ab  | 40.83±2.16 ab   | 42.06±1.54 ab    | 43.89±0.52 a    | 41.45±1.13 ab  |
| Mg g/kg                 | 12.51±0.02 a | 12.65±0.12 a   | 12.48±0.06 a    | 12.58±0.07 a     | 12.45±0.05 a    | 12.71±0.11 a   |
| S g/kg                  | 0.46±0.00 a  | 0.46±0.00 a    | 0.43±0.00 b     | 0.45±0.00 a      | 0.45±0.00 ab    | 0.46±0.01 a    |
| pH                      | 7.83±0.08 a  | 7.98±0.05 a    | 7.92±0.07 a     | 7.85±0.05 a      | 7.83±0.07 a     | 7.94±0.14 a    |

Note: Data in the table are presented as mean ± standard error (SE). Different lowercase letters within the same row indicate significant differences among levels ( $P < 0.05$ )

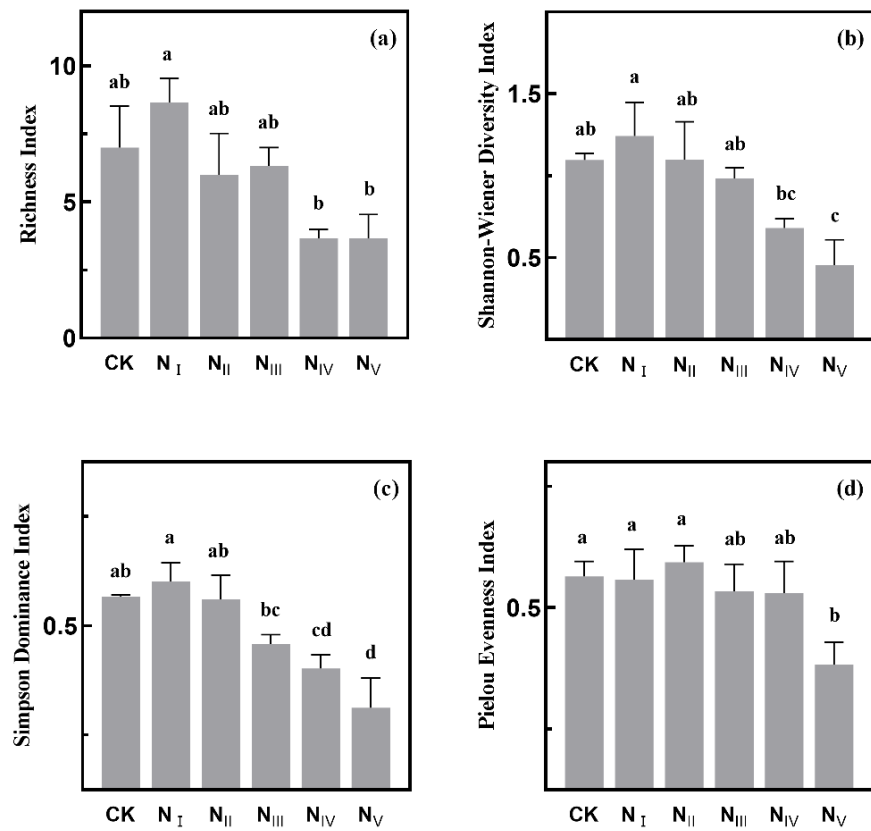

**Figure S1.** Richness index (a), Shannon-Wiener diversity index (b), Simpson dominance index (c), Pielou Evenness index (d) of alpine steppe under different N addition levels. Different lowercase letters indicate significant differences among levels ( $P < 0.05$ ). Error bars represent standard error (SE) ( $n = 3$ ).

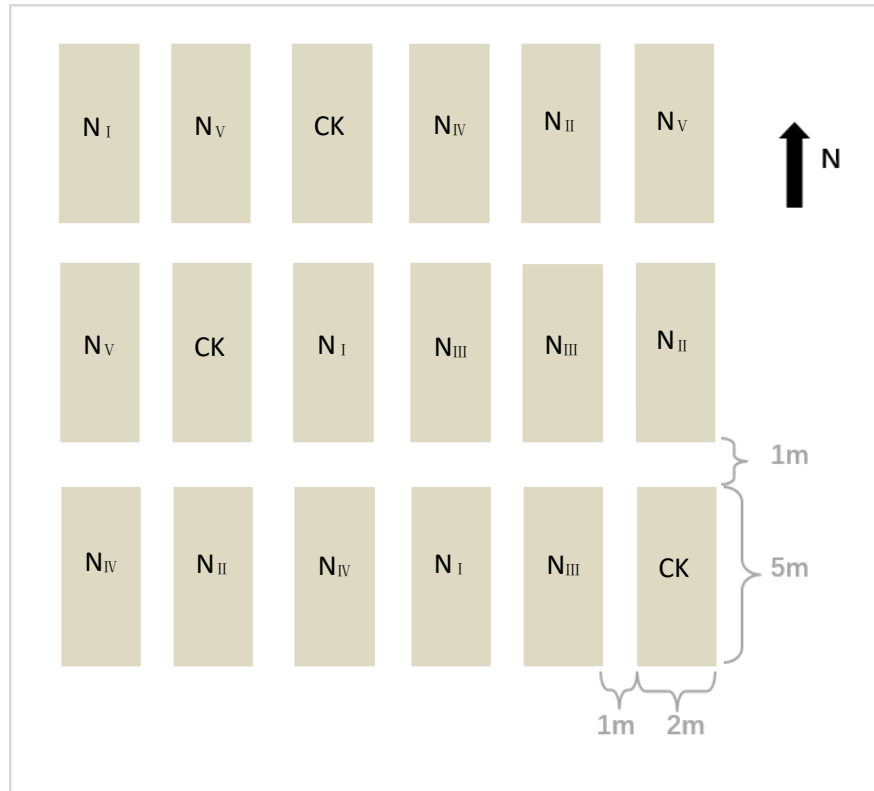

**Figure S2** The arrangement of experimental plots of different N addition rates.
